# Supplementary material
Source: PubMed Central journal article supplement (PMC10416090)
Supplement: NIHMS1856584-supplement-Supplemental.pdf [file NIHMS1856584-supplement-Supplemental.pdf]

**Supplemental Table S1.** Distribution of immunomodulatory medications prior to propensity score overlap weighting among patients with SARDs who received either BNT162b2 or mRNA-1273 vaccine

|                                      | <b>Overall<br/>(N=10531)</b> | <b>BNT162b2<br/>recipients<br/>(N=6010)</b> | <b>mRNA-1273<br/>recipients<br/>(N=4521)</b> | <b>Standardized<br/>mean difference</b> |
|--------------------------------------|------------------------------|---------------------------------------------|----------------------------------------------|-----------------------------------------|
| <b>Immunomodulatory medications</b>  |                              |                                             |                                              |                                         |
| <i>Biologic DMARDs</i>               |                              |                                             |                                              |                                         |
| Anti-CD20 monoclonal antibody        | 264 (3)                      | 152 (3)                                     | 112 (2)                                      | 0.0011                                  |
| TNF inhibitor                        | 2865 (27)                    | 1628 (27)                                   | 1237 (27)                                    | 0.0091                                  |
| IL-6 receptor inhibitor              | 418 (4)                      | 239 (4)                                     | 179 (4)                                      | 0.0089                                  |
| B-cell activating factor inhibitor   | 83 (1)                       | 52 (1)                                      | 31 (1)                                       | 0.0197                                  |
| IL-23 inhibitor                      | 37 (0)                       | 24 (0)                                      | 13 (0)                                       | 0.0046                                  |
| IL-17 inhibitor                      | 408 (4)                      | 225 (4)                                     | 183 (4)                                      | 0.0124                                  |
| IL-12/IL-23 inhibitor                | 97 (1)                       | 58 (1)                                      | 39 (1)                                       | 0.0073                                  |
| IL-1 inhibitor                       | 29 (0)                       | 16 (0)                                      | 13 (0)                                       | 0.0076                                  |
| CTLA-4 immunoglobulin                | 343 (3)                      | 189 (3)                                     | 154 (3)                                      | 0.0183                                  |
| IL-5 inhibitor                       | 17 (0)                       | 8 (0)                                       | 9 (0)                                        | 0.0250                                  |
| C5 inhibitor                         | 4 (0)                        | 3 (0)                                       | 1 (0)                                        | 0.0159                                  |
| <i>Targeted synthetic DMARD</i>      |                              |                                             |                                              |                                         |
| JAK inhibitor                        | 636 (6)                      | 339 (6)                                     | 297 (7)                                      | 0.0419                                  |
| <i>Conventional synthetic DMARDs</i> |                              |                                             |                                              |                                         |
| Hydroxychloroquine                   | 3460 (33)                    | 1970 (33)                                   | 1490 (33)                                    | 0.0051                                  |
| Hydroxychloroquine monotherapy       | 2278 (22)                    | 1297 (22)                                   | 981 (22)                                     | 0.0022                                  |
| Chloroquine                          | 11 (0)                       | 10 (0)                                      | 1 (0)                                        | 0.0421                                  |
| Methotrexate                         | 3726 (35)                    | 2115 (35)                                   | 1611 (36)                                    | 0.0035                                  |
| Mycophenolate mofetil                | 487 (5)                      | 299 (5)                                     | 188 (4)                                      | 0.0413                                  |
| Mycophenolic acid                    | 48 (0)                       | 37 (1)                                      | 11 (0)                                       | 0.0616                                  |
| Leflunomide                          | 566 (5)                      | 294 (5)                                     | 272 (6)                                      | 0.0568                                  |
| Azathioprine                         | 265 (3)                      | 153 (3)                                     | 112 (2)                                      | 0.0036                                  |
| Sulfasalazine                        | 499 (5)                      | 291 (5)                                     | 208 (5)                                      | 0.0173                                  |
| Apremilast                           | 212 (2)                      | 122 (2)                                     | 90 (2)                                       | 0.0026                                  |
| Cyclophosphamide                     | 64 (1)                       | 41 (1)                                      | 23 (1)                                       | 0.0199                                  |
| Cyclosporine                         | 29 (0)                       | 20 (0)                                      | 9 (0)                                        | 0.0310                                  |
| Tacrolimus                           | 127 (1)                      | 97 (2)                                      | 30 (1)                                       | 0.0914                                  |
| Oral glucocorticoid                  | 1125 (11)                    | 692 (12)                                    | 433 (10)                                     | 0.0621                                  |

**Supplemental Table S2. Immunomodulatory medications used to identify patients with systemic rheumatic disease**

| Category and generic name                   | Brand name(s)       | Mechanism of action (for targeted therapy) | Route         | CPT code if intravenous                                                            |
|---------------------------------------------|---------------------|--------------------------------------------|---------------|------------------------------------------------------------------------------------|
| <b>Glucocorticoids</b>                      |                     |                                            |               |                                                                                    |
| Prednisone<br>(minimum of 30 pills)         | Deltasone           |                                            | Oral          |                                                                                    |
|                                             | Prednicot           |                                            |               |                                                                                    |
|                                             | Prednisone Intensol |                                            |               |                                                                                    |
|                                             | Rayos               |                                            |               |                                                                                    |
|                                             | Sterapred           |                                            |               |                                                                                    |
| Methylprednisolone<br>(minimum of 30 pills) | Sterapred DS        |                                            | Oral          |                                                                                    |
|                                             | Medrol              |                                            |               |                                                                                    |
| <b>Conventional Synthetic DMARDs</b>        |                     |                                            |               |                                                                                    |
| Azathioprine                                | Imuran              |                                            | Oral          |                                                                                    |
|                                             | Azasan              |                                            |               |                                                                                    |
| Methotrexate                                | Otrexup             |                                            | Oral or subQ  |                                                                                    |
|                                             | Rasuvo              |                                            |               |                                                                                    |
|                                             | Rheumatrex          |                                            |               |                                                                                    |
|                                             | Trexall             |                                            |               |                                                                                    |
| Leflunomide                                 | Arava               |                                            | Oral          |                                                                                    |
| Mycophenolic acid                           | CellCept            |                                            | Oral          |                                                                                    |
| Mycophenolate mofetil                       | Myfortic            |                                            | Oral          |                                                                                    |
| Sulfasalazine                               | Azulfidine          |                                            | Oral          |                                                                                    |
| Hydroxychloroquine                          | Plaquenil           |                                            | Oral          |                                                                                    |
| Chloroquine                                 | Aralen              |                                            | Oral          |                                                                                    |
| <b>Targeted Synthetic DMARDs</b>            |                     |                                            |               |                                                                                    |
| Tofacitinib                                 | Xeljanz             | JAK inhibitor                              | Oral          |                                                                                    |
| Baricitinib                                 | Olumiant            | JAK inhibitor                              | Oral          |                                                                                    |
| Upadacitinib                                | Rinvoq              | JAK inhibitor                              | Oral          |                                                                                    |
| <b>Biologic DMARDs</b>                      |                     |                                            |               |                                                                                    |
| Rituximab                                   | Rituxan             | Anti-CD20 monoclonal antibody              | IV            | J9310                                                                              |
|                                             | Truxima             |                                            |               | Q5115                                                                              |
|                                             | Ruxience            |                                            |               | Q5119                                                                              |
| Ocrelizumab                                 | Ocrevus             | Anti-CD20 monoclonal antibody              | IV            | J2350                                                                              |
| Abatacept                                   | Orencia             | CTLA-4 Ig                                  | subQ or IV    | J0129                                                                              |
|                                             | Infliximab          | Remicade                                   | TNF inhibitor | IV                                                                                 |
| Infliximab                                  | Inflectra           |                                            |               | Q5103                                                                              |
|                                             | Renflexis           |                                            |               | Q5104                                                                              |
|                                             | Avsola              |                                            |               | Q5121                                                                              |
|                                             | Etanercept          | Enbrel                                     | TNF inhibitor | subQ                                                                               |
| Adalimumab                                  | Humira              | TNF inhibitor                              | subQ          |                                                                                    |
| Certolizumab                                | Cimzia              | TNF inhibitor                              | subQ or IV    | J0717                                                                              |
| Golimumab                                   | Simponi             | TNF inhibitor                              | subQ or IV    | J1602                                                                              |
| Anakinra                                    | Kineret             | IL-1 inhibitor                             | subQ or IV    | n/a (coded under "other biologic" J3490 or J3590 but doesn't seem to have its own) |

|                  |            |                    |            |       |
|------------------|------------|--------------------|------------|-------|
| Canakinumab      | Ilaris     | IL-1 inhibitor     | subQ or IV | J0638 |
| Mepolizumab      | Nucala     | IL-5 inhibitor     | subQ or IV | J2182 |
| Benralizumab     | Fasenra    | IL-5 inhibitor     | subQ or IV | J0517 |
| Tocilizumab      | Actemra    | IL-6 inhibitor     | subQ or IV | J3262 |
| Sarilumab        | Kevzara    | IL-6 inhibitor     | subQ       |       |
| Secukinumab      | Cosentyx   | IL-17A inhibitor   | subQ       |       |
| Ixekizumab       | Taltz      | IL-17A inhibitor   | subQ       |       |
| Ustekinumab      | Stelara    | IL-12/23 inhibitor | subQ or IV | J3358 |
| Guselkumab       | Tremfya    | IL-23 inhibitor    | subQ       |       |
| Belimumab        | Benlysta   | BLyS inhibitor     | subQ or IV | J0490 |
| Eculizumab       | Soliris    | C5 inhibitor       | IV         | J1300 |
| <b>Other</b>     |            |                    |            |       |
| Tacrolimus       | Prograf    |                    | Oral or IV | J7525 |
|                  | Envarsus   |                    |            |       |
|                  | Astagraf   |                    |            |       |
|                  | Hecoria    |                    |            |       |
| Cyclosporine     | Gengraf    |                    | Oral or IV | J7516 |
|                  | Neoral     |                    |            |       |
|                  | Sandimmune |                    |            |       |
| Apremilast       | Otezla     | PDE4 inhibitor     | Oral       |       |
| Cyclophosphamide | Cytoxan    |                    | Oral or IV | J9070 |

**Supplemental Table S3.** Distribution of vaccine type and breakthrough across time blocks included in analysis

| Time block | Vaccine type (n, %) |           |           | Breakthrough infection (n, %) |
|------------|---------------------|-----------|-----------|-------------------------------|
|            | Pfizer              | Moderna   | Total     |                               |
| 0          | 113 (2)             | 266 (6)   | 379 (4)   | 50 (6)                        |
| 1          | 264 (5)             | 306 (7)   | 570 (6)   | 55 (7)                        |
| 2          | 768 (14)            | 509 (16)  | 1277 (13) | 98 (13)                       |
| 3          | 772 (14)            | 709 (16)  | 1481 (15) | 86 (11)                       |
| 4          | 722 (13)            | 1150 (27) | 1872 (19) | 143 (18)                      |
| 5          | 863 (16)            | 556 (13)  | 1419 (14) | 113 (15)                      |
| 6          | 958 (17)            | 361 (8)   | 1319 (13) | 107 (14)                      |
| 7          | 656 (12)            | 240 (6)   | 896 (9)   | 70 (9)                        |
| 8          | 293 (5)             | 162 (4)   | 455 (5)   | 35 (5)                        |
| 9          | 107 (2)             | 63 (1)    | 170 (2)   | 18 (2)                        |
| Total      | 5516 (56)           | 4322 (44) | 9838      | 775 (8)                       |

**Supplemental Table S4.** Days between most recent prescription date and index date

|             | Pfizer Arm   | Moderna Arm  | Overall      |
|-------------|--------------|--------------|--------------|
| N           | 5516         | 4322         | 9838         |
| Mean, SD    | 75.8 (81.3)  | 76.5 (79.7)  | 76.1 (80.6)  |
| Median, IQR | 44 (15, 110) | 47 (17, 110) | 45 (16, 110) |
